# Supplementary material for: Compact Modeling Framework v3.0 for high-resolution global ocean-ice-atmosphere models
Source: Copernicus journal article supplement (doi:10.5194/gmd-2017-294), 2018-01-24
Supplement: Supplementary file [file gmd-2017-294-AC3-supplement.pdf]

# Vortex-Investigating Terra Integrated Model

## VITIM 3.1.1

### user guide

K.V. Ushakov, V.V. Kalmykov, R.A. Ibrayev, and M.N. Kaurkin.

May 28, 2018

## Contents

|          |                                                                          |           |
|----------|--------------------------------------------------------------------------|-----------|
| <b>1</b> | <b>Introduction</b>                                                      | <b>2</b>  |
| 1.1      | Some features of this release . . . . .                                  | 2         |
| <b>2</b> | <b>User workplace preparation</b>                                        | <b>2</b>  |
| 2.1      | Installing the operating system and compiler . . . . .                   | 2         |
| 2.2      | SSH configuring . . . . .                                                | 2         |
| 2.3      | Installing geophysical software . . . . .                                | 3         |
| 2.4      | Downloading the model and the geophysical data . . . . .                 | 4         |
| <b>3</b> | <b>How to choose the model configuration and start working</b>           | <b>5</b>  |
| 3.1      | Compiling and running under CMF2.0 . . . . .                             | 5         |
| 3.2      | Compiling and running under CMF3.0 . . . . .                             | 6         |
| <b>4</b> | <b>Basic options</b>                                                     | <b>7</b>  |
| 4.1      | Launching on various numbers of tasks . . . . .                          | 7         |
| 4.2      | Selecting atmospheric and runoff forcing . . . . .                       | 7         |
| 4.3      | INMIO built-in ice model . . . . .                                       | 7         |
| 4.4      | Working on reduced ice grid (available under CMF2.0 only) . . . . .      | 7         |
| 4.5      | Working in offline analysis mode (available under CMF2.0 only) . . . . . | 8         |
| <b>5</b> | <b>Compact Modelling Framework CMF3.0</b>                                | <b>8</b>  |
| 5.1      | Getting started with the CMF3.0 . . . . .                                | 8         |
| 5.2      | Model components . . . . .                                               | 10        |
| 5.3      | Events in the system . . . . .                                           | 15        |
| 5.4      | Services . . . . .                                                       | 19        |
| 5.5      | Working with NetCDF-files . . . . .                                      | 23        |
| 5.6      | GA-communicator . . . . .                                                | 26        |
| 5.7      | Additional tools for the model . . . . .                                 | 29        |
| <b>6</b> | <b>Short instructions</b>                                                | <b>31</b> |
| 6.1      | Configuration switch . . . . .                                           | 31        |
| 6.2      | Deep reconfiguring of the forcing under CMF2.0 . . . . .                 | 31        |
| <b>7</b> | <b>Elements of numerical and program implementation</b>                  | <b>32</b> |
| 7.1      | Notes on the differences between CMF2.0 and CMF3.0 . . . . .             | 32        |
| <b>A</b> | <b>Appendix: namelist parameters</b>                                     | <b>32</b> |

## 1 Introduction

This manual is a pilot version of the instruction for the user of the coupled geoscientific model VITIM. By studying it, you can sequentially go through all levels of the deployment of the model and immersion in the work, from installing the operating system to working with the internal content of the component modules and the coupler. At the end of initial levels, simple tests are provided in order to make sure, in the first approximation, that everything functions properly. All paths to folders and files in this manual will be listed from the folder **vitim3.1**, or files and folders will be given without paths.

### 1.1 Some features of this release

- Supported configurations: global20, WOM025\_ice, WOM05\_ice, arctic0125a, arctic025t, laptev0125(a,c) и WOM01.
- Supported work in the CMF2.0 and CMF3.0 frameworks.
- Sea ice models supported: Schrum and CICE.
- The CICE ice model may be launched on the reduced grid (relatively to the ocean one) for processor resources saving (only under CMF2.0).
- SCRIP interpolations can take into account the input and output land-sea masks.
- Diagnostic utilities `o_diagn` include: time averaging and flux calculations for meridional heat transport studies.

## 2 User workplace preparation

### 2.1 Installing the operating system and compiler

The subtleties of the operating system installation are beyond the scope of this guide, completely lying on your shoulders and communication channels with the Internet reference resources. The current version of VITIM installed on PC works with the Ubuntu 14.04 operating system. With newer releases of Ubuntu, there were difficulties, which, however, are likely to be overcome by a couple of lines in `.bashrc`. Therefore, the desire to deal with them on your part is warmly welcome. The model is configured for the Intel Fortran compiler. To work with CMF3.0, you will need version 15 or higher.

### 2.2 SSH configuring

SSH is a network protocol that allows you to work remotely with a certain system, for example, with a cluster. To connect to a remote machine, for example, we type:

```
ssh ivanov@mvs10p.jsc.ru
```

How can the system understand that you are really ivanov? You will either be asked to enter the password (issued to you by the administrator of the machine), or the system will ask for your private key. It is believed that the method with the key is safer. What is its essence? You generate a pair of keys with `ssh-keygen` command: public and private. The public one must be sent to the administrator of the machine, and the private one you keep in a safe place. When connecting, you show the private key. If the pair has matched, you enter the cluster. When connecting, an error of the following kind may appear: **WARNING: UNPROTECTED PRIVATE KEY FILE!** This means that ssh has detected that your data in the `~/.ssh` folder has too open access rights and can be read directly without any hacking. Therefore, you have to set the right permissions on the folder and its contents (read about access rights)

```
chmod 700 ~/.ssh && chmod 600 ~/.ssh/*
```

How can we simplify the work with ssh? For each host, we create an entry in the configuration file. Whenever possible, ssh will access the information in this config file, minimizing the number of user-entered parameters. For example, if you need to present a private key to log in, then you add the following lines to the file `~/.ssh/config`:

```
Host inmio
  HostName 83.149.207.46
  Port 22
  User ivanov
  IdentityFile ~/.ssh/ivanov_inmio_key
```

This is what you need to do in order to gain access to the GROSM server, which stores the model codes, installation scripts, atmospheric forcing data, etc. Generate a key pair and ask the administrator (sherema@yandex.ru) to register the public key.

Let's check:

```
angarsk@angarsk:~$ ssh inmio
Welcome to Ubuntu 16.04 LTS (GNU/Linux 4.4.0-21-generic x86_64)

 * Documentation:  https://help.ubuntu.com/

739 packages can be updated.
384 updates are security updates.

Last login: Fri Mar  2 15:26:27 2018 from 91.225.112.
```

## 2.3 Installing geophysical software

The model uses a number of libraries for I/O, interprocessor communications, data processing, etc. For convenience, a script is provided, which downloads them, installs and sets environment variables. Download the latest version of the script and ancillary files from the remote repository on the GrOSM server:

```
git clone ssh://inmio/git/scripts.git
```

To configure the installation script, it is sufficient to set several main parameters (for example, the necessary versions of the compilers: `mpif90` or `mpiifort`, etc.) in the script entries. At this stage, you must have the necessary compilers installed. On a PC, it is the Intel Compiler, and on the cluster – loaded modules, usually specified for convenience in the `.bashrc` file. Now you can run the installation script. In this example, the software will be installed into the folder `$HOME/House/software`

```
bash install_soft.sh --install-dir $HOME/software --all \
--mpifc [Fortran compiler] --mpicc [C compiler] --mpicxx [C++ compiler]
```

Usually, for Intel compilers, the following parameters are suitable:

[Fortran compiler] = `mpiifort`

[C compiler] = `mpicc`

[C++ compiler] = `mpicpc`

By default, the script will try to download data from remote servers. If there is no Internet connection, manually transfer the library archives to the cluster and try again. Where to get the archives? Run on an Internet-connected system the script with parameters `--all --only-download`. The required archives will appear in the target installation folder. At the end of the installation, tests are automatically performed. Make sure they are completed without errors:

```

Testing NetCDF...SUCCESS
+ mpiifort -c -cpp test_ga.f90 -I/home/angarsk/House/software/include
+ mpiifort -o test_ga.exe test_ga.o -L/home/angarsk/House/software/lib
+ mpiexec.hydra -np 4 ./test_ga.exe
Testing GlobalArrays...GA_INIT
Testing GlobalArrays...MA_INIT
Testing GlobalArrays...NGA_CREATE_IRREG
Testing GlobalArrays...NGA_DISTR
Testing GlobalArrays...GA_PUT
Testing GlobalArrays...GA_SPD_INVERT          0
Testing GlobalArrays...NGA_GATHER
SUCCESS
+ rm -f simple_xy_par.nc test_ga.exe test_netcdf.exe '*.mod' test_ga.o tes
+ set +x
=====
ALL TESTS PASSED
=====

```

As a result, the software and auxiliary scripts are installed in the **\$HOME/House/software** folder. Close the console and reopen it, so that the necessary paths are registered on your system. Now, typing, for example, `which cdo`, you'll find that the path leads to your software folder. Let's check:

```

angarsk@angarsk:~$ which cdo
/home/angarsk/House/software/bin/cdo
angarsk@angarsk:~$ which h5dump
/home/angarsk/House/software/bin/h5dump
angarsk@angarsk:~$ which ncdump
/home/angarsk/House/software/bin/ncdump
angarsk@angarsk:~$ locate job_launcher.sh
/home/angarsk/House/software/bin/job_launcher.sh
/home/angarsk/Plots/scripts/launchers/job_launcher.sh

```

## 2.4 Downloading the model and the geophysical data

The user workstation is the folder **vitim3.1**, in which all models and data are stored. To get it, download the workpiece from the repository:

```
git clone inmio:/git/vitim3.1
```

Download the latest versions of models from the repositories to the folder **comps**:

```

cd vitim3.1/comps/ocn
git clone inmio:/git/inmio4.1.git
cd ../ice
git clone -b vitim2.1 inmio:/git/cice-5.1.git

```

For the minimum run, the topography ETOPO, the Levitus data WOA2009 and the CNYFv2 forcing should be in the **vitim3.1/data\_external** folder. If this data already exists on your computer (cluster), then put in the **data\_external** symbolic links to its locations. If not, run the download scripts (unpacking the forcing will take a few minutes):

```

cd ../../data_external
bash get_IC_databases.sh
bash get_forcing_databases.sh
cd ../coupling

```

In the future, when working with more advanced model configurations, make sure that the `data_external` folder has the necessary forcing or links to it.

### 3 How to choose the model configuration and start working

The model comes with a set of several standard configurations with different computational domains, resolution, forcing and enabled parameterizations. When you first get acquainted, you just need to choose one of them. Pay attention, however, to the resolution: grids with a size greater than  $200 \times 100$  usually do not fit into the RAM on the PC.

In the file `coupling/config`, specify the full path to the `vitim3.1` folder and select the configuration of the numerical experiment (uncomment the corresponding line). For example, the Laptev Sea with a grid size of  $40 \times 60$ :

```
export VITIM_PATH=~/VITIM3.1/vitim3.1
...
export RES="laptev0125c"; export GRID="40x60"; export INMIOCOUPLED="yes"
```

Now create symbolic links among model files for this configuration.

```
bash links_inmio set
```

Your further steps depend on the version of the Compact Modeling Framework (CMF).

#### 3.1 Compiling and running under CMF2.0

Compile the stand-alone ocean model (i.e. coupled model with non-interactive atmosphere and land runoff components):

```
cd coupling
./makeclean_all
```

A complete set of compilation commands will be executed with preliminary removal of the object files. In the future, you can call `./make_all` – the system will recompile only changed files (see, however, the note in the section 4.1). Make sure to see the message "Coupled model for component set <ocn atm\_ncar lnd\_core ice\_cice> compiled successfully."

Now create the files of initial conditions and interpolation weights. Warning: when this command is executed, all nc-files in the folders (symlinks) `coupling/data` and `coupling/off/data` will be deleted.

```
cd configure
./generate_laptev0125c
```

In this example, the script for generating grids for the `laptev0125c` configuration is called. For other configurations, scripts are named in a similar way and stored in their instances of the `configure` folder (links to which, as you already know, are activated when you call `bash links_inmio set`). If there occurs a library error, try to call `make clean` in the `off/SCRIP/source` folder. Check that there are now 5 files with weights, the initial conditions, and an active link to forcing in the `coupling/data` folder:

```
angarsk@angarsk:~/VITIM3.1/vitim3.1/coupling/data$ ls -l
ATM_NCAR_192x94_to_ICE_CICE_40x60.nc
ATM_NCAR_192x94_to_OCN_40x60.nc
CNYFv2
ICE_CICE_40x60_to_OCN_40x60.nc
LND_CORE_360x180_to_OCN_40x60.nc
OCN_40x60_to_ICE_CICE_40x60.nc
OCN_40x60x49_IC.nc
```

Create symbolic links for CICE ice model. Warning: if this step is forgotten, the model may start without visible troubles, but produce incorrect results!

```
bash links_cice set
```

After this step, there must not be any broken symbolic links in the **coupling** folder. The model launch is performed from the folder **coupling**. This is an example of the launch command:

```
mpirun -np 7 ./model.exe CPL 1 OCN 2 ATM 1 LND 1 ICE 2 abc 0 0 3
```

Here abc is the name of the numerical experiment (arbitrary 3 symbols), 0 0 3 – experiment duration (model years, months and days).

### 3.2 Compiling and running under CMF3.0

Compile CICE and the coupled ocean-ice model with non-interactive atmosphere and runoff components:

```
cd coupling/comp_ice_cice/cice
./comp_ice
cd ../..
bash make ocn atm_ncar lnd_core ice_cice --clean
```

Make sure that the message appeared: "Executable <./cpl.exe> was created successfully."

Now create the files of initial conditions and interpolation weights. Warning: when this command is executed, all nc-files in the folders (symlinks) **coupling/data** и **coupling/off/data** will be deleted.

```
cd off
bash generate_ocean_all.sh 40 60 49 abc
```

In this example, 40 and 60 are the horizontal grid sizes (should be the same as in the configuration you selected in the **coupling/config** file), 49 - the number of vertical levels (so far only this option is available), abc – the name of your experiment (any combination of 3 numbers or letters). If there occurs a library error, try to call **make clean** in the **off/SCRIP/source** folder. Check that there are now 5 files with weights, initial conditions, and also an active link to the forcing in **coupling/data**:

```
angarsk@angarsk:~/VITIM3.1/vitim3.1/coupling/data$ ls -l
ATM_NCAR_192x94_to_ICE_CICE_40x60.nc
ATM_NCAR_192x94_to_OCN_40x60.nc
CNYFv2
ICE_CICE_40x60_to_OCN_40x60.nc
LND_CORE_360x180_to_OCN_40x60.nc
OCN_40x60_to_ICE_CICE_40x60.nc
OCN_abc_IC.nc
```

Create symbolic links for CICE ice model. Warning: if this step is forgotten, the model may start without visible troubles, but produce incorrect results!

```
bash links_cice set
```

After this step, there must not be any broken symbolic links in the **coupling** folder. Into the folder **coupling/configure** it is necessary to put a namelist file for the given name of the experiment (in our example it is **exp\_abc.in**). Its contents are easily readable, examples are given in the **coupling/configure** folders for all basic configurations.

The launch is performed from the **coupling** folder. Here is an example of the launch command:

```
bash job_launcher.sh --machine ubu --np 9 --exe ./cpl.exe
--args "DTR 1 CPL 1 IOD 1 OCN 2 ATM 1 LND 1 ICE 2 abc"
```

## 4 Basic options

### 4.1 Launching on various numbers of tasks

In the example above, you can specify other cores (tasks) numbers for OCN, ATM, LND, ICE components. The utility `coupling/comp_cpl/bin/test_decomp.exe`, which is created when the system is compiled under CMF2.0, will tell you the valid number of cores and the corresponding subdomain sizes. For CICE operation, it is necessary that the number of cores and subdomain sizes of one core of the ice model be specified in the file `coupling/comp_ice_cice/cice/comp_ice` for the selected configuration, and the number of cores also specified in the

`coupling/comp_ice_cice/cice/input_templates/name_of_configuration/ice.in`.

After every such reconfiguring (affecting CICE), you need to rebuild completely the CICE and the coupled model. In the command line parameter `np` at launch, do not forget to specify the total number of cores for the coupled model. If you do not need to run one of the components, its name and the number of cores in the launch command are not listed. In particular, if you do not specify ICE, the ocean built-in thermodynamic ice model of C. Schrum will work.

### 4.2 Selecting atmospheric and runoff forcing

In the 2.4 section, we have downloaded the atmospheric and river data of CNYFv2 – the normal CORE-I year. The standard model configuration can also work with IAFv2 – “real” synoptic data of the CORE-II protocol, based on reanalysis and observations for 1948-2009

([http://data1.gfdl.noaa.gov/nomads/forms/core/COREv2/CIAF\\_v2.html](http://data1.gfdl.noaa.gov/nomads/forms/core/COREv2/CIAF_v2.html)). They occupy about 30 GB and, usually, are available on clusters used by the GrOSM. To select the database that your `atm_ncar` and `lnd_core` models will read, specify the parameters of the named lists `atm_forcing_type` and `lnd_rivers_type` in the files `coupling/configure/atm_list.in` and `coupling/configure/lnd_list.in`, respectively. The description of the main parameters of the named lists of the model is given in the appendix A.

### 4.3 INMIO built-in ice model

If you do not specify the ICE and its number of cores in the launch command, the ocean built-in thermodynamic ice model by C. Schrum will work. In this case, to save memory when generating grids (especially for the WOM01 configuration), you can disable the generation of CICE grids: switch `ice_grid` to `.false.` in `comps/ocn/inmio4.1/driver_cmf2.0/off_ocn_module.f90` (in the CMF2.0 environment) or `comps/ocn/inmio4.1/driver_cmf3.0/cmf_ocn_off_adapter.f90` (in the CMF3.0 environment). If you work with CICE, make sure that `ice_grid = .true.`

### 4.4 Working on reduced ice grid (available under CMF2.0 only)

Several standard configurations, for saving resources, by default work on the reduced ice grid of CICE, which covers only the northern polar cap. In the rest of the calculation domain, in this case, the built-in ice model by C. Schrum works. When you turn on a standard reduced-grid configuration

- Check the flag `cice_and_schrum` in `comps/ocn/inmio4.1/driver_cmf2.0/o_par_module.f90`. For a reduced grid it must be `.true.`, for a regular grid `.false.`
- Check the value of `additional_ny` at the top of the `coupling/comp_ice_cice/off_ice_cice_module.f90` file. For a regular grid it must be 0, for a reduced one – see recommended values in comments.
- To work on a reduced CICE grid, it is necessary that the decomposition of the ocean with respect to the `j` axis consists of at least two bands (in order for one to hold the ice of CICE and the other to work with Schrum model). Check this with the `test_decomp.exe` utility.

If you want to *enable* grid reduction for a particular configuration (for example, take a global regular model and use it to explore the Arctic), then do the following. It is recommended that you change these settings carefully only if you understand what is happening. To enable reduction:

- In the file `off_ice_ice_module.f90` specify `additional_ny` – a negative integer, meaning how many rows must be removed from the southern side of the grid
- Specify the new j-size of the grid in `config` and in `ice_list.in`, new block sizes in `comp_ice`.
- Add commands for changing CICE sizes in the names of three interpolation files at the end of the grid generation script (see examples in the `global120` and `WOM025_ice` configurations)

To turn reduction off, take everything back: set `additional_ny=0`, the ice grid size equal to the ocean one, interpolation files are not renamed.

#### 4.5 Working in offline analysis mode (available under CMF2.0 only)

If you run the model in offline analysis mode, then the value of the key in the file `coupling/analysis_flag` should be equal to `.false`. If in the normal calculation mode, then `.true`.

## 5 Compact Modelling Framework CMF3.0

The Compact Modelling Framework performs two main tasks:

- Support of service operations for a particular model (for example, working with the file system). The CMF allows you to clearly separate the code of physical model (for example, the ocean) and the code responsible for the technology (for example, the procedure for saving data). This separation, firstly, simplifies the architecture (each module deals with its own business), and, secondly, gives the possibility for the developer of service modules to modify their insides without interfering with the physical model.
- Support for coupling of models (for example, creating an ocean-atmosphere model). Historically, models are separate programs that calculate their own physics (ocean model models the ocean). How to join two independent models so that they work together? One approach is to connect them using an adapter (similar to an electrical adapter) to a modelling framework. As a result, within itself each model continues to consider its physics, and through the adapter it communicates with the other participants of the coupled model.

### 5.1 Getting started with the CMF3.0

To understand how the system works and what is needed to run it, it's better to use specific examples. Example 1 shows a sequence of actions that allows you to run a simple CMF test from scratch. The following examples explain how you can complicate this workflow to take full advantage of the CMF capabilities. The last example shows how to connect your model to the system.

#### Example 1: running an empty atmosphere-ocean coupled model

In this example, we show how to run from scratch a simple CMF3.0 test, simulating the launch of two models (ocean and atmosphere) that do nothing. Go to the model folder and run:

```
cd test_suit
bash tester.sh --t empty_comps --clean --test
```

What happens in this test? A special script is launched, which allows to combine the model build and its launch (this script is made for convenience, now it is not necessary to deep into how it works). The script goes into the folder `empty_comps`, containing a test (but from the point of view of the system quite full) version of the coupled ocean-atmosphere model. In the folder there is a simple script describing the test (`test_description.sh`), which looks like this:



```
COMPS_BUILD="ocn_test atm_ncar"
RUN_COMMAND[1]="-np 5 ./cpl.exe DTR 1 IOD 1 CPL 1 OCN 1 ATM 1 tst"
```

That is, the script `tester.sh` sees that it has to build a coupled model from the `ocn_test` and `atm_ncar` folders and run it on 5 cores, giving services (not yet think about this), ocean and atmosphere 1 core to each. In the console, you will see that the system has output the experiment parameters and entered the computational cycle phase, which in this test consists only of receiving STOP signals (normal termination) from the models. Result: You just started the *hello-world* example of a coupled model. The model did nothing, but only sent a signal about the normal completion. In the following examples we will add work for it.

## Example 2: teaching the model to save diagnostics

In the previous example, the model was simply connected to the CMF using an adapter, ran off the assigned time of the experiment and ended. Where are these actions described? The logic of any model is described with the help of a special adapter class, which, as befits an adapter, knows how to connect to the system and at the same time has inputs for the physical model. To understand the further process, it is helpful to read the first sections of the manual about the model component.

Now you roughly understand the logic of the system and it's time to look at the code of the previous example. Open the file `/empty_comps/comp_ocn_test/cmf_ocn_test_cpl_adapter.f90`. You see the implementation of the very interfaces that are described in the manual. In this example, they are empty (hence the name of the test). The only non-empty method calls `ini_reg_comp` to register the model in the system. It is thanks to this registration that the system knows how many steps requested to run this empty model and what are sizes of its arrays.

Now, let's teach the model to write the diagnostics and for this we will slightly complicate the code. To do this, create a new test (already created for you) and call it `/save_dg`. The logic of the new model is not much more complicated and is described in the file

`/empty_comps/comp_ocn_test/cmf_ocn_test_cpl_adapter.f90`. In addition to registering the model, we added 2 arrays (2D and 3D), code that allocates memory for them, and added registration of events over these arrays. Here appears the second important property of CMF, namely the ability to say "I want this array to be written every 2 hours to a file". To understand what this is about, be sure to read the beginning of the section on system events. Now you can go on to what the example does. In the implementation of the interface `ini_reg_data` for a 2D array we see:

```
call this % register_array(arr_name = "test_dg_2D", indexing = "ij",
    arr = save_dg_2D(iwest:ieast, jsouth:jnorth))
call this % register_periodic_event(arr_name = "test_dg_2D", act = "SAVE_DG", dh = 1)
```

The first line registers the array `save_dg_2D` under the name "test\_dg\_2D" in the system (in fact, the system remembers its address and indexing). The second line registers a periodic event over this array, saying that every 1 hour you need to create a diagnostic save event (namely, take the array at the address, send it to the appropriate service for saving to the diagnostic file). You can run this test, but first look at the file `test_description.sh`:

```
COMPS_BUILD="ocn_test"
RUN_COMMAND[1]="-np 4 ./cpl.exe DTR 1 OCN 1 IOD 1 CPL 1 tst"
....
```

We ask to build only the ocean model and run it on 1 core (the remaining cores are service ones). Below, the file describes the conditions checking results (namely, that for different numbers of cores we get the same diagnostic file). Now you do not have to think about it. Running:

```
cd test_suit
bash tester.sh --t save_dg --clean --test
```

The script will run 5 different tests, comparing the results with the first one, and will report the results. The result: we figured out how the system understands where is the model and how to work with it, learned how to generate events and launched the first adequate model that flushes data to disk.

### Example \*: connecting your model

Until now, we have run built-in tests. Now you can create your own model (as the main model at the root of the system, or while in the same form of a test). To do this:

#### Create a backbone of the derived class

To create a new model, a script is provided (it is available if you installed the software correctly):

```
bash generate_comp.sh ocn_test
```

The script creates the model folder, all subfolders needed, two derived class templates (for the component and the off-block) and **makefile** building it all. You can immediately execute **make** – an ocean model library will be compiled that does nothing and consists of two files. Actually, all the models from the previous examples began with the call of this script.

#### Fill in the derived class

Fill in every class method according to your model requirements.

#### Connect a component to the system

The compilation system is constructed in such a way that if you add your model (for example, the ocean), then at compilation it is sufficient to specify the name of the folder, which has an agreed form. During compiling, the build script takes the name of your version of the component and understands that the first three letters denote the component of the Earth system (**ocn**, **atm**, **ice**, **lnd**), and then your version (**ncar**, **test**, **inmio**). The script will go into the desired folder (for example, **comp\_ocn\_test**), build the library there, and tell the main program that the compilation will involve the ocean model, and its version (for example, **test**). All these conventions are automatically applied if you call **generate\_comp.sh**. The main script of the compilation system **make** takes the names of the folders (models). Actually, it is called by the script **tester.sh**, which used in examples above. For example, if we created a new ocean model **ocn\_test** at the root of the system, we can build and run in this way:

```
bash make ocn_test
mpirun -np 4 ./exe OCN 1 CPL 1 DTR 1 IOD 1 exp
```

When calling the ocean procedures, will be used exactly the version of the ocean that was transferred to the compiling script (namely, **ocn\_test**).

## 5.2 Model components

### General idea

How can CMF learn about your model (for example, the ocean) and, accordingly, help it to perform service activities and communicate with other models?

One approach is to define a special adapter class, or in other words, a generic model (component). Such a component is a model skeleton and defines only its interface, but not implementation. The system will be able to call the adapter class methods (because it knows the interface), which are very general actions, for example, performing the entire initialization or one full physics step. At the same time, the system does not know what exactly will be done inside these methods – it leaves their implementation at the discretion of the model (for example, the calculation of thermodynamics and dynamics in the main step).

In practice, the described process becomes an inheritance of the class **Component** and implementation of abstract interfaces. Each model defines them at its own discretion. Plus, the user can call convenient methods defined for him in the **Component** class (for example, registering an event). As a result, to work in the system it is enough to create one adapter class that calls the specific methods of the model (your physical procedures) and the auxiliary methods of the system (defined for convenience in the class **Component**). The logic of the class will determine the logic of the work of your model in the CMF.

## Component class interface

Below are some of the interfaces of the Component class:

```
! Abstract methods that must be implemented in the model

! Abstract method for registering the model in the system
! must call register_model()
procedure(I_ini_reg_comp), DEFERRED :: ini_reg_comp

! The abstract method for executing all allocate()'s in the model,
! since further it will be necessary to transfer addresses
procedure(I_ini_allocate), DEFERRED :: ini_allocate

! Abstract method for registering all data and mapping events in the system
! must call register_array(), register_event()
procedure(I_ini_reg_data), DEFERRED :: ini_reg_data

! Abstract method for all user-defined initializations
procedure(I_ini_main), DEFERRED :: ini_main

! Abstract method for one physical model step
procedure(I_make_step), DEFERRED :: make_step

! Abstract method for all finalizing actions
procedure(I_finalize), DEFERRED :: finalize

! Auxiliary methods of the base class that can be called from the model

! Registers a model in the system
procedure, public :: register_model

! Registers an array in the system
generic, public :: register_array => ...

! Creates a generator for time-uniform events
procedure, public :: register_periodic_event

! Creates a generator to bind to the time axis of a netCDF file
procedure, public :: register_synced_event

! Generates a single event
procedure, public :: raise_event
```

## More on auxiliary methods

```
procedure, public :: register_model

Description:      Registers a model in the system
Arguments:
*_size           - model array sizes
decomp_type     - decomposition type ("1D" or "2D")
timestep_sec    - time step, seconds
```

```
generic, public :: register_array
```

Description: Registers an array in the system, saving its parameters (address, attributes) under tag <arr\_name>

Arguments:

arr\_name - array name (string name, not Fortran name)  
indexing - indexing ("ijk" or "kij")  
arr - the Fortran array itself (its address)

```
generic, public :: register_periodic_event
```

Description: Creates a generator for time-uniform events

Arguments:

arr\_name - string name of a registered array  
act - the action to be done at the moment of the event, e.g., 'SAVE\_DG'  
src - (optional) data source (file, other component), e.g., '/data/ocn\_test\_data.nc'  
dst - (optional) data receiver  
info - (optional) any other information  
dh, dm, ds - (optional) event period (hours, or minutes, or seconds. If all equal to 0, the the event will occur only once in the beginning of the run (e.g., 'READ\_CP')).

```
procedure, public :: register_synced_event
```

Description: Creates a generator for event that is bind to the time axis of a netCDF-file

Arguments:

arr\_name - string name of a registered array  
src - (optional) file data source, e.g., '/data/ncar\_temp.nc'  
start\_date - (optional) from which date to start binding. By default, from the start of experiment.

```
procedure, public :: raise_event
```

Description: Raises a user-defined event.

Arguments:

arr\_name - string name of a registered array  
src - (optional) data source (file, other component), e.g., '/data/ocn\_test\_data.nc'  
dst - (optional) data receiver  
dt\_rec - (optional) date record (if we want to take file data related to a specific date)

## For system developers

### How the time cycle of the model looks

After all initializations, the component enters the main time cycle `model_cycle`:

```

subroutine model_cycle(this)
  ! Parameters skipped for brevity

  ! Sending all arrays for registration to services
  call this % ev_scheduler_ % get_all_events(new_events)
  do i = 1, new_events % length()
    ev = new_events % get(i)
    call this % send_request(ev)
    call this % try_register_comp_ga(ev)
  end do
  call this % raise_event(act = "STOP")
  call CompSplitter % barrier()

  do while (.TRUE.)

    ! Ask Scheduler to collect all events of the current step
    call this % ev_scheduler_ % gather_events(this % model_time(), new_events)

    ! Process events on the side of the model
    do i = 1, new_events % length()
      call this % handle_event(new_events % get(i))
    end do

    ! While timer @model_clock_@ ticks, we are working in the cycle
    if (this % model_clock_ % is_stopped()) EXIT

    ! Calling physical model timestep
    call this % make_step()

    ! Clock ticks
    call this % model_clock_ % tick()
  end do

  ! At the end of the cycle, we notify the services
  ! that the model has completed its work normally
  call this % raise_event(act = "STOP")

end subroutine

```

### How the model reacts to events

As described in the Events section, after an event is generated, it is first processed by the model. To do this, the Component class defines the method `handle_event()` (short code):

```

subroutine handle_event(this, ev)
  ...

  ! Different types of events lead to different reaction
  select case (ev % action())

    ! Sending events: wait until the ga-array is freed, put the data there,
    ! synchronize and mark the array as full,
    ! send request to the corresponding service
    case("SAVE_CP", "SAVE_DG", "SEND_MP")

```

```

do while (TRIM(this % comm_ % get_info(ev % ga_name(), &
    COMM_GA_STATUS)) /= "free"); end do
call this % put_to_ga(ev)
call this % comm_ % sync(CompSplitter % i_am_id())
if (CompSplitter % is_first_rank()) &
    call this % comm_ % put_info(ev % ga_name(), COMM_GA_STATUS, "full")
call this % send_request(ev)

! Receiving events: send the request to the service, wait until the ga-array
! is full, get data from it, synchronize and mark the array as free
case("READ_FD")
    call this % send_request(ev)

do while (TRIM(this % comm_ % get_info(ev % ga_name(), &
    COMM_GA_STATUS)) /= "full"); end do
call this % get_from_ga(ev)
call this % comm_ % sync(CompSplitter % i_am_id())
if(CompSplitter % is_first_rank()) &
    call this % comm_ % put_info(ev % ga_name(), COMM_GA_STATUS, "free")

! Receiving of mapping: there is no request, we simply wait until the ga-array is full,
! get data from it, synchronize and mark the array as free
case("RECV_MP")
    ! This is push-event, so no request:
    ! just register, wait, get, mark as free

do while (TRIM(this % comm_ % get_info(ev % ga_name(), &
    COMM_GA_STATUS)) == "free")
    ! call Debugger % log_msg("Current GA status is: &
    ! "//TRIM(this % comm_ % get_info(ev % ga_name(),&
    ! COMM_GA_STATUS))
end do
call this % get_from_ga(ev)

call this % comm_ % sync(CompSplitter % i_am_id())
if(CompSplitter % is_first_rank()) &
    call this % comm_ % put_info(ev % ga_name(), COMM_GA_STATUS, "free")

! Just send request and exit
case("STOP")
    call this % send_request(ev)

! Send the request and wait for the service to finish,
! because we can not continue working
case("ERROR")
    call this % send_request(ev)
    call CompSplitter % barrier()

case default
    call this % fatal_error("raise event: &
        unknown action: <//TRIM(ev % action())//>")
end select
end subroutine

```

## How to change the reaction of the model to events

Warning: In this paragraph, changes are made to the system code. If you are not sure about your actions, contact the developer. To change the response or add a new behavior, simply expand the `handle_event()` method.

Warning: mind the synchronization issues! The model should be blocked if the ga-array (which is the exchange buffer) is still occupied (for the “put data” event) and, conversely, is free (for the “get data” event). For this, the status of the information array is checked. If you do not set a lock, there is no guarantee that the model will receive or send complete data. After the model has put or get the data, it must change the status of the ga-array accordingly.

### Note: adding a new component of the Earth system

Warning: In this paragraph, changes are made to the system code. If you are not sure about your actions, contact the developer. In the file `ComponentSplitter` add the required component name:

```
character(3), parameter :: COMPONENT_NAMES(9) = &
(/ "DTR", "CPL", "IOD", "OCN", "ATM", "ICE", "LND", "SEA", "TST"/)
```

### Notes for the system developer

If in the future there will be an opportunity to get rid of explicit synchronization through an array of information, it will be good. Now this approach is chosen, since we can not “lose data”. That is, even if some component (ocean model) is faster than another component (atmosphere model or IOD, which slowly writes data to a file), we do not have the right to lose the array. The accumulation of arrays in the form of a queue will also lead to nothing, since models usually work at a constant speed and as a result, the queue will simply exhaust all available memory. Therefore now, if the “fast” model is ready to put data, but the ga-buffer is still occupied, it is blocked.

## 5.3 Events in the system

### General idea

Events are messages about the need to perform certain actions on an array of data. For example, when we want to send model data for saving to a diagnostic file, we generate (raise) an event with the type `SAVE_DG` and some parameters (for example, a destination file). Events are produced on the side of the model: by an unpredictable call of the `raise_event()` from the user (for example, when a critical drop in the level in the ocean occurs), or by a generator (but, in fact, by the same `raise_event()`). Note: both the model and the services have their own reaction to events (see the sections about the Model Component and Services).

The first to respond to the event is the model. It looks at its type and determines what to do (e.g., in case of `SAVE_DG` – put data into the ga-array, send a request to the service and continue running). Then the event is packed into an MPI message and flies away as a request to the services (if the model decided to send the event). Services unpack the event, look at its name, and either process it or ignore.

### Event types

Now the following types of events are defined (the reaction to them is presented for understanding and is not set in the events themselves, but in their handlers in the classes `Component` and `Service`):

- `READ_FD` – reading from a file (its special cases are `READ_IC`, `READ_CP`).  
Component: send a request to the service, wait for the data, get the data, continue working.  
IOD service: receive a request, take the data from the file, put it into ga-array.
- `SEND_MP` – sending data to mapping and then to another component  
Component: put data into ga, continue working.  
CPL service: take the data from ga, interpolate it to the recipient’s grid, put into the recipient’s ga.
- `RECV_MP` – receiving mapped data from another component  
Component: wait until the data appears in ga, get it, continue working.  
CPL service: do nothing (everything is already done at the `SEND_MP` step)

- **SAVE\_CP** – control point saving  
Component: put data into ga, send a request to the service  
IOD service: receive a request, get data from ga, write to a file.
- **SAVE\_DG** – Saving diagnostics (in fact, the same as **SAVE\_CP**, but separated for performance reasons)
- **STOP** – normal finish of the model work.  
Component: send a request, continue working  
Services: When the last model sends the **STOP** message, services stop normally.
- **ERROR** – emergency shutdown of the model.  
Component: send a request, stand on hold, because we can not continue working.  
Services: A service that receives this message must shutdown.

## Generators

In general, since the `Component` class defines the method `raise_event()`, theoretically, event generators are not needed, because at any time in the cycle, you can send a request to the service and it will somehow react. But in practice, this approach means that the user must monitor the time himself and send requests at the right moments. To simplify the life of the user, several event generators are defined in the system, that is, objects that, depending on the model time, issue a request or do nothing.

An example of a generator can be given by the generator of periodic events, e.g., saving diagnosis every 2 days. Such a generator creates an event in 0 hours, 48 hours, 96 hours, ... of model time and does not create anything in the remaining time intervals (for example, at 11 hours 12 minutes of model time)

## How to register an event?

To register an event it is enough to transfer it to the generator. For this, the user calls the method of the class `Component`, which itself passes it to the right destination (see interface of the `Component`).

## For system developers

The `VarEvent.f90` file defines the abstract class `VarEvent`, which represents the interface of any generator:

```
! Abstract method that updates the internal state of the generator
! and does (or does not) return an event
procedure(I_update_ve), DEFERRED :: update

! Abstract destructor
procedure(I_destroy_ve), DEFERRED :: destroy
```

Specific implementations of generators inherit the base class and determine what the object will do when calling `update()`. For example, the `VarEventNormal` class simply checks the proportionality of the current time to the period, which is specified when the generator is initialized.

Next, the `EventScheduler` class creates an array of polymorphic references to all such generators and, whenever the timer proceeds, it queries all the generators if they are ready to issue a request.

## How to define a new event type

If you want to add a new event, you must:

- In the class `Actions`, add a new event type, its priority, and the corresponding service that will handle it.
- In the class `Event`, add a condition to create your event type. These conditions allow to verify that the event is complete (for example, the mapping event must have a destination, otherwise it can not be processed).



- If you need additional fields that are not in the Event class, add them, making sure that you have implemented their packing to and unpacking from an MPI message.

Now a new type of event is defined in the system. Events with this type can be built and sent. At the same time, in order for the message to actually produce some kind of impact on the system, we need to add event processing to the services and component (see the corresponding sections on services and the component).

### How to make a generator

To create your generator, you must inherit the base class `VarEvent` and implement the two abstract methods of the base class. In addition, since a pointer is passed to store all the generators, you must provide the pointer to the generator object, for which it's convenient to make a modular function (analogous to `new` in C++). For example, the `VarEventNormal` class is used to generate periodic events:

```

module var_event_normal_module

use var_event_module

type, extends(VarEvent) :: VarEventNormal
private
  integer :: period_sec_ = 0
  type(DateTime) :: start_date_
contains
  procedure :: update
  procedure :: destroy
end type

CONTAINS

! Analog of 'new': create a dynamic object and return a reference to it.
! And at the same time we perform the usual functions of the constructor -
! initialize the generator with the start date, event and generation period.
function new_VarEventNormal(ev, start_date, dd, dh, dm, ds) result (obj)
  type(Event), intent(in) :: ev
  type(DateTime), intent(in) :: start_date
  integer, intent(in) :: dd, dh, dm, ds
  class(VarEventNormal), pointer :: obj

  allocate(VarEventNormal::obj)

  obj % ev_ = ev
  obj % start_date_ = start_date
  obj % period_sec_ = dd*60*60*24 + dh*60*60 + dm*60 + ds
end function

! The main function of generation. Depending on the current time
! <cur_time> it generates event <ev>
! and returns .true. or .false.
! In fact, it simply checks the proportionality of the period of generation to the
! difference of current and start time.
logical function update(this, cur_time, ev)
  class(VarEventNormal) :: this
  type(DateTime), intent(in) :: cur_time
  type(Event), intent(inout) :: ev

```

```

integer(8) :: sec_from_start

sec_from_start = date2sec(cur_time) - date2sec(this % start_date_)
update = sec_from_start >= 0 .AND. MOD(sec_from_start, this % period_sec_) == 0

if (update) then
    ev = this % ev_
end if
end function

! The object does not contain internal dynamic data, so the destructor is empty.
subroutine destroy(this)
    class(VarEventNormal) :: this
end subroutine

end module

```

Now another type of generator is defined in the system, but the system does not know about it yet. To connect the generator to the system and make life easier for the user, you need to add a simple wrapper to create a new generator in the class `Component`:

```

subroutine register_periodic_event(this, arr_name, act, src, dst, dd, dh, dm, ds)
    class(Component) :: this
    character(*), optional, intent(in) :: src, dst
    character(*), intent(in) :: arr_name, act
    integer, intent(in), optional :: dd, dh, dm, ds
    type(Event) :: ev
    type(ArrayInfo) :: arr_info

    arr_info = this % get_array_info(arr_name)
    ev = Event(arr_info = arr_info, act = act, owner = CompSplitter % i_am(), &
        src = src, dst = dst, file_prefix = this % prefix())

    call this % ev_scheduler_ % add( &
        new_VarEventNormal( ev, ExpInfo % start_date(), &
            MERGE(dd,0,PRESENT(dd)), MERGE(dh,0,PRESENT(dh)), &
            MERGE(dm,0,PRESENT(dm)), MERGE(ds,0,PRESENT(ds))))
end subroutine

```

In the end, the user writes something like:

```

call this % register_periodic_event(arr_name = "test_dg_2D", act = "SAVE_DG", dh = 1)

```

and the wrapper `register_periodic_event()` constructs the event object, defines some default variables, creates the generator object in the dynamic memory, and gives a pointer to it in the object `EventScheduler`.

### Notes for the system developer

Now for the type of event, you need to know the service that will handle it. This information is not used anywhere, except for the moment when a ga-array is registered in the component, since it must clearly know who to synchronize with. If the issue of explicit synchronization when creating an array in `CommunicatorGA % init_array ()` is resolved, this dependency can be removed altogether.

Perhaps it makes sense to make an analog of JSON for Fortran (FSON).

## 5.4 Services

### General idea

The Compact Modelling Framework in some form implements a service-oriented architecture (SOA). The idea is that on the side of the client (model) events are generated and corresponding requests (control flow) are sent, to which correspond to the data stored in the Global arrays (data flow). On the server side, some services parse requests from the single queue and perform work (analogous to the pipeline).

Now, the following services are defined:

- DTR (distributor) – subscribed to all events, just sends them to all other services. It is necessary for maintaining a single queue in the parallel environment (analogue of the master).
- IOD (I/O device) – subscribed to events `READ_FD`, `SAVE_CP`, `SAVE_DG`. When it receives a message, it unpacks it, understands what is required of it (for example, take data from GA named “`test_ga_ocn`” and write to file “`OCN_180x90_tst_DG`”) and performs the necessary actions. The other types of messages are simply ignored.
- CPL (coupler) – subscribed to event `SEND_MP`. This event determines where to get the data, what to do with it, and where to put it (that is, it’s a push event, since events `RECV_MP` are not required to process it).

### How it works

To simplify the creation of a new service, a basic abstract class `Service` is implemented, which has the following interface:

```
! Base class constructor
procedure, public :: init_base

! Base class destructor
procedure, public :: destroy_base

! Main cycle of events processing
procedure, public :: request_cycle

! Virtual method for processing one event
procedure(I_handle_request), private, DEFERRED :: handle_request

! Virtual constructor
procedure(I_init_service), public, DEFERRED :: init

! Virtual destructor
procedure(I_destroy_service), public, DEFERRED :: destroy
```

The main program `cpl_main.f90` contains the following lines:

```
select case(CompSplitter % i_am())
  case("DTR")
    allocate(ServiceDTR :: service_p)
  case("CPL")
    allocate(ServiceCPL :: service_p)
  case("IOD")
    allocate(ServiceIOD :: service_p)
end select

! Start model cycle
```

```

if (CompSplitter % is_model()) then
    call comp_p % model_cycle()
else
    call service_p % init_base(comm)
    call service_p % init()
    call service_p % request_cycle()
end if

```

That is, every process that belongs to the group of processes of a certain service (defined in `CompSplitter`), allocates its polymorphic pointer and then calls the constructor and enters the event processing cycle `request_cycle()`. (At the end of the program, service destructors are called in the same way)

The base class method `request_cycle()` contains two identical loops, one for registering arrays, and the second for real event processing. The structure of the loop is simple: for the time being there are working models, accept the request, call the virtual method `handle_request(ev)` and track the `STOP` signals from the models.

```

do while (this % running_count_ > 0)

    ! Receive any request
    call this % receive_request(ev)
    call this % handle_request(ev)

    select case(ev % action())
        ! One component finish work
        case("STOP")
            this % running_count_ = this % running_count_ - 1
            CYCLE
    end select
end do

```

### How to make a new service

- Create a skeleton of the derived class

As a result, to create a service, you need to inherit the class `Service` and define three virtual methods: `init`, `destroy`, `handle_request`.

```

module service_tst_module

    use utils_module
    use actions_module
    use service_module
    use event_module
    use communicator_ga_module
    use component_splitter_module

    implicit none

    type, extends(Service) :: ServiceTST
    private

    contains
        !=====
        ! ===== PUBLIC API =====
        procedure, public :: init => init_tst

```

```

    procedure, public :: destroy => destroy_tst
    procedure, public :: handle_request => handle_tst

    procedure, private :: handle_my_method1
    procedure, private :: handle_my_method2

    ! ===== PUBLIC API =====
    !=====
end type

CONTAINS

subroutine init_tst(this)
    class(ServiceTST) :: this
    ! Your constructor
end subroutine

subroutine destroy_tst(this)
    class(ServiceTST) :: this
    ! Your destructor
end subroutine

subroutine handle_tst(this, ev)
    class(ServiceTST) :: this
    ! Code of event handler ev (read further)
end subroutine

! Rest methods
end module

```

- Fill in the class

We fill the `init_tst`, `destroy_tst` methods with the necessary actions. Next, fill in the main method – `handle_tst`. Under the current agreement, when the service “sees” the array for the first time, the method must register this communication channel (that is, the ga-array) in the communicator. For this you can use the following construction:

```

if (.NOT. this % comm_ % is_registered(ev % ga_name())) then
    call this % try_register_service_ga(ev)
...
! Other actions required for the first time when you receive a message of this type
! ( i.e. by this ga-channel)
end if

```

If the array is already registered, you can immediately deal with its processing. As an example, the `handle_request` method of the class `ServiceIOD` is shown below. It handles only events related to working with files and the error message `ERROR` (which simply leads to an abnormal termination). Other events are ignored. During the first reception, the array is registered, during the rest it is processing the event and outputting information to `stdout` with the built-in auxiliary method of the base class `report_handle()`. The methods `handle_put()`, `handle_get()` contain the real logic of extracting an array from `ga` and writing it to a file using `FileHandler_NC`.

```

subroutine handle_iod(this, ev)
    class(ServiceIOD) :: this
    type(Event), intent(in) :: ev

```

```

select case (ev % action())
  case("SAVE_CP", "SAVE_DG")
    if (.NOT. this % comm_ % is_registered(ev % ga_name())) then
      call this % try_register_service_ga(ev)
    else
      call this % handle_put(ev)
      call this % report_handle(ev)
    end if

  case("READ_FD")
    if (.NOT. this % comm_ % is_registered(ev % ga_name())) then
      call this % try_register_service_ga(ev)
    else
      call this % handle_get(ev)
      call this % report_handle(ev)
    end if

  case("ERROR")
    call this % report_handle(ev)
    call exit(1)
end select
end subroutine

```

Warning: mind the synchronization issues! The service should be blocked if the ga-array (which is the exchange buffer) is still occupied (for the “put data” event) and, conversely, is free (for the “get data” event). For this, the status of the information array is checked. If you do not set the lock, there is no guarantee that the resulting data will be complete. After the service has put or get the data, it must change the status of the ga-array accordingly.

For example, when ServiceIOD receives the request SAVE\_DG, it knows (see the corresponding handler in Component) that the data is already completely in the ga-array, so no additional checks are needed. When the service is ready to release the ga-array (in the method `handle_put()`) after the data has been copied into its memory, it synchronizes and marks the array as free:

```

call this % comm_ % sync(service_id)
if(CompSplitter % is_first_rank()) call this % comm_ % put_info(ev % ga_name(), &
  COMM_GA_STATUS, "free")

```

- Register the service in the system

Warning: In this paragraph, changes are made to the system code. If you are not sure about your actions, contact the developer.

At the moment the system does not know anything about the new service (call it TST), so you need to:

1) In the file `ComponentSplitter` add the necessary service names to the arrays of components and services:

```

character(3), parameter :: COMPONENT_NAMES(9) = &
  (/ "DTR", "CPL", "IOD", "OCN", "ATM", "ICE", "LND", "SEA", "TST"/)
character(3), parameter :: SERVICE_COMPS(4) = &
  (/ "DTR", "CPL", "IOD", "TST"/)

```

The class performs division into groups of processes in the multiprocessor environment, and now every process can find out if it belongs to the group, for example, of the CPL.

2) Connect the service module in the `cpl_main` and define the creation of a real service object using the previous item:

```

select case(CompSplitter % i_am())
...
    case("TST")
        allocate(ServiceTST :: service_p)
...
end select

```

Now, if you specify TST 2 at startup, the system will start the new service on 2 processes.

- Send right requests from the client

Now the service is fully operational – it starts and accepts requests from the client (for the time being it's just notification about the end of the run STOP). In order for the client to generate the right events, it is necessary to define a new event, to make a generator for it, and to describe the actions necessary from the client. How to do this is described in the Model Component section.

### Notes for the system developer

If in the future there will be an opportunity to get rid of explicit synchronization through an array of information, it will be good. Now this approach is chosen, since we can not “lose data”. That is, even if some component (ocean model) is faster than another component (atmosphere model or IOD, which slowly writes data to a file), we do not have the right to lose the array. The accumulation of arrays in the form of a queue will also lead to nothing, since models usually work at a constant speed and as a result, the queue will simply exhaust all available memory. Therefore now, if the “fast” model is ready to put data, but the ga-buffer is still occupied, it is blocked.

## 5.5 Working with NetCDF-files

### General idea

NetCDF is a hardware-independent self-describing format and a set of libraries for working with it. NetCDF is the actual standard for storing geophysical data. As a result, to save, for example, an array of speeds, you do not need to invent your procedures with a heap of read/writes, but just call the ready function of the NetCDF library. An important property of the procedures is that they can be performed in both sequential and parallel modes.

NetCDF has a rather high-level interface in terms of operations on files, but rather low-level from the user's point of view, since it is necessary to understand the intricacies of certain built-in procedures. In this case, the control over the correctness of all operations lies entirely with the user. Since it is often necessary to work with NetCDF files, there is a desire to create a helper class that will have a high-level interface, hiding all the complexities of NetCDF within itself. So the class `FileHandler_NC` appeared. Firstly, it simplifies the work with NetCDF, and secondly, it adds some functionality. For example, the class provides a convenient way to access data not only by index, but also by timestamp and an ability to read the time axis of files in different formats. To work with the class, it's enough to link in the module `file_handler_nc_module`, create an instance of the class, and use it to manage the file.

`FileHandler_NC` is used in:

- `Service_IOD` for parallel put/get-operations
- `Component` for analysis of a file with time axis
- `Offline` to create initial condition files
- `Service_CPL` to read interpolation weight files
- in data assimilation system, etc.

As a result, all operations with NetCDF of the whole system are delegated to the helper class, which greatly simplifies the code by encapsulating all the logic in one place.

## Work example

Different ways of working with the class can be found in the test `Coupler/test/test_filehandler_nc.f90`. For example, the standard scheme of work is: create a handler, use it to create a file and variables, write data.

```
use file_handler_nc_module

type(FileHandler_NC) :: handler

call handler % create_file("test_2D_dt.nc", mpi_comm = tm % comm())
call handler % create_dim("i", il)
call handler % create_dim("j", jl)
call handler % create_dim("k", kl)
call handler % create_time_dim()

call handler % create_var("test_2D_dt", "real4", "i", "j", dimt_name = "TIME")

call handler % put(arr_2D, lo = decomp % lower_bound_2D(), &
    hi = decomp % upper_bound_2D(), dt = DateTime(1988, 03, 15, 0, 0, 0))

call handler % close_file()
```

## Description of API

### Create/open/close file

```
create_file(filename, mpi_comm)
```

Description: Create file or rewrite previous

Parameters:

filename - string name of file to create  
mpi\_comm - <optional> MPI mpi\_comm if it is parallel run

```
open_file(filename, mpi_comm, status)
```

Description: Try to open file

Parameters:

filename - string name of file to open  
mpi\_comm - <optional> MPI mpi\_comm if it is parallel run  
status - <optional> status of operation: 0 if ok, 1 is error

```
open_or_create_file(filename, mpi_comm)
```

Description: Try open and then create file

Parameters: Combination of parameters for open\_file and create\_file procedures

```
close_file()
```

Description: Close current file

Parameters:

### Create dimensions

```
create_dim(name, length)
```



Description: add NC-dimension to file  
Parameters:  
name - name of dimension  
length - corresponding length of dimension

create\_time\_dim()

Description: add time NC-dimension to file  
Parameters:

### Create/open variables on dimensions

create\_var(var\_name, var\_type, dim1\_name, dim2\_name, dim3\_name, dimt\_name)

Description: Try to create var. Error if this var is already exist.  
Parameters:  
var\_name - string name of file to create  
var\_type - type of variable  
dim\*\_name - create variable of these dimensions

open\_var(var\_name, status)

Description: Try to open variable  
Parameters:  
var\_name - string name of variable to open  
status - <optional> status of operation: 0 if ok, 1 is error

open\_or\_create\_var(this, varname, var\_type, dim1\_name, dim2\_name, dim3\_name, dimt\_name)

Description: try open and then create variable  
Parameters: combination of parameters for open\_var and create\_var procedures

### Write/read variables

put/get (arr, lo, hi, dt)

Description: put and get data.  
Parameters:  
arr - data array of supported type and dimension (int4, int8, real4, real8, 1D, 2D, 3D)  
lo, hi - lower and upper bounds of dimensions (e.g. (/1, 1/), (/ il, jl /) )  
dt - <optional> DateTime corresponding to field. Necessary for time vars.

### Various operations

put\_att/get\_att(att\_name, att\_val, is\_global)

Description: put/get attribute to variable or whole file  
Parameters:  
att\_name - name of attribute  
att\_val - value of attribute of supported type (int, character)  
is\_global - <optional> if .TRUE., this attribute is made NF90\_GLOBAL

```
function get_dim_size(dim_name)
Description:      Return size of interested dimension
Parameters:
  dim_name      - dimension name
```

```
get_time_axis(time_axis)
Description:      Get time axis
Parameters:
  time_axis     - integer(8), allocatable :: time_axis(:) - where to put time axis
                 in seconds from DateTime % epoch_start()
```

```
logical is_time_var()
Description:      Check if current variable has a time axis
Parameters:
```

## 5.6 GA-communicator

The general idea is to allow the user to easily access different parts of a distributed array. This is done using the abstraction of PGAS (Partitioned Global Address Space). PGAS suggests that there is some virtual huge array that is accessible from any process that participated in its creation. Of course, in fact, there is no global array, and its parts are stored in processes' memory, but the user does not know about it – all the subtleties are taken over by the library, which is why simplicity is achieved. For example, a client at process 12 can ask for an item with indexes [124, 97], as if it has direct access to it. Behind the scenes, PGAS will know which process the item belongs to (for example, the 18th), execute the MPI request for it, get the result and return it to the client.

An implementation of PGAS abstraction is the Global Arrays (GA) library (which, by the way, is also installed by the geophysical software installation script). There are also other implementations. Finally, the `Communicator_GA` class is a class of the CMF system, representing a kind of facade for this library, that is, it defines an even higher-level interface and hides some of the subtleties of the GA.

### Interface

```
subroutine init(max_index, proc_local_count)
Description:      construct communicator object for <num_of_sides> components
Parameters:
  max_index      - maximum index of component, which will be used for work
                 with object (normally equal to number of defined comps)
  proc_local_count - size of local communicator, required for agile memory
                 allocation
```

```
subroutine init_group(src_id, src_ranks, dst_id, dst_ranks)
Description:      register processor group between two sides
Parameters:
  src_id, dst_id  - ids of sides
  src_ranks, dst_ranks - ranks of all processes of sides
```

```
subroutine init_array(arr_name, datatype, dimnum, holder_id, holder_decomp, &
                    subscriber_id)
```

Description: initialize array based on Decomposition object, it can be accessed from <holder\_id> and <subscriber\_id> components, but stored on <holder\_id>. If array with such name already exists - delete previous and create new.

Parameters:

|               |                                                       |
|---------------|-------------------------------------------------------|
| arr_name      | - string name of array                                |
| datatype      | - supported datatype string: "real4", "real8", "int4" |
| dimnum        | - supported dimension string: "2D", "3D"              |
| holder_id     | - id of source component who hold array in memory     |
| holder_decomp | - decomposition of holder side                        |
| subscriber_id | - id of subscriber component                          |

```
subroutine init_array(arr_name, datatype, dim1_len, dim2_len, dim3_len, holder_id, &
                    holder_size, subscriber_id)
```

Description: initialize array based on dimension sizes, it can be accessed from <holder\_id> and <subscriber\_id> components, but stored on <holder\_id>. If array with such name already exists - delete previous and create new.

Parameters:

|               |                                                       |
|---------------|-------------------------------------------------------|
| arr_name      | - string name of array                                |
| datatype      | - supported datatype string: "real4", "real8", "int4" |
| dimnum        | - supported dimension string: "2D", "3D"              |
| dim*_len,     | - size of each dimension                              |
| holder_id     | - id of source component who hold array in memory     |
| holder_size   | - how many processors owns the GA                     |
| subscriber_id | - id of subscriber component                          |

```
subroutine destroy_array(arr_name)
```

Description: destroy global array (you should set appropriate group before this call - the same as on init\_array)

Parameters:

|          |                        |
|----------|------------------------|
| arr_name | - string name of array |
|----------|------------------------|

```
subroutine sync(src_id, dst_id)
```

Description: barrier for src\_id, dst\_id

Parameters:

|                |                     |
|----------------|---------------------|
| src_id, dst_id | - indexes of groups |
|----------------|---------------------|

```
integer function id(arr_name)
```

Description: return ga\_id of array with given name.  
Return -1 if no such array.

Parameters:

|          |                        |
|----------|------------------------|
| arr_name | - string name of array |
|----------|------------------------|

```
subroutine put (arr_name, lo, hi, arr)
```

```
subroutine get (arr_name, lo, hi, arr)
```

Description: put/get data

Parameters:

|          |                        |
|----------|------------------------|
| arr_name | - string name of array |
|----------|------------------------|

|        |                                                                     |
|--------|---------------------------------------------------------------------|
| lo, hi | - arrays representing area (in global indexing) you want to put/get |
| arr    | - your buffer for data                                              |

## Examples of usage

In more detail, examples of use can be found in tests for the class (**coupler/test/ga\_communicator**). Below are the popular examples taken just from there.

### Creating an array shared by two components

The class allows to create an array that will be distributed on one component, but still visible to another component. This allows, for example, to create a temperature array that will be physically distributed over the ocean's cores (and they can put and get data from it), but, in addition, the service of the coupler can also work with this array, although it does not store any part of it.

```

! Ask the CompSplitter for component identifiers
ocn_id = CompSplitter % comp_id("OCN")
cpl_id = CompSplitter % comp_id("CPL")

! Initialize the communicator object with the number of components and the local
! communicator size of each component
call comm_ga % init(CompSplitter % comp_defined(), CompSplitter % comm_local_size())

! Ask the CompSplitter for process lists of each components
call CompSplitter % proc_list("OCN", list = proc_list_ocn)
call CompSplitter % proc_list("CPL", list = proc_list_cpl)

! With their help, register the group [ocn_id, cpl_id]
call comm_ga % init_group(ocn_id, proc_list_ocn, cpl_id, proc_list_cpl)

! The ocean creates its decomposition and distributes it to all -
! it is necessary that all interested core groups call registration
! of the array with the same parameters.
! In a real program, you can take decomposition data from the global
! ModelInfo array that stores information about all components
if (CompSplitter % i_am() == "OCN") then
    ocn_decomp = Decomposition(il, jl, kl, "2D", CompSplitter % comm_local_size(), &
        CompSplitter % rank_local())
end if

call ocn_decomp % broadcast(CompSplitter % proc_first("OCN"), &
    CompSplitter % comm_world())

! Finally, we register the array, indicating the ocean as the holder,
! passing its decomposition (so that the GA allocates the array exactly so),
! and the subscriber is the coupler
call comm_ga % init_array(arr_name = "glob_2D", datatype = "real4", dimnum = "2D", &
    holder_id = ocn_id, holder_decomp = ocn_decomp, subscriber_id = cpl_id)

! Now you can put data into the array: for example, let only the ocean do it,
! so that each core puts a global array (nonsense in a real program)
if (CompSplitter % i_am() == "CPL") call comm_ga % put("glob_2D", (/ 1, 1 /), &
    (/ il, jl /), tgd % glob(:, :, 1, 1))

```

```

! We necessarily perform synchronization, that is, we wait till all the
! data has been put, since the put/get calls are nonblocking
call comm_ga % sync(ocn_id, cpl_id)

! Now we can take the data: all the cores of both components take local pieces
! and compare them with the predefined test
call comm_ga % get("glob_2D", (/ w, s /), (/ e, n /), tgd % loc_2D)
call tm % assert(tgd % is_correct(arr_type = "2D"), "all get 2D local patch &
    defined in parameters")

```

### Creating an array that is shared by only one component

Sometimes you need to create an array for use only within one component. In this example, we will create such an array for the ocean component. In addition, instead of passing the ocean decomposition to the procedure, we simply give the dimensions so that the class itself decomposes the array for us. Most steps repeat the previous example, except that the group and the array are now created for the same identifiers (the holder and the subscriber are the same), and the version of the procedure for registering the array without indicating the decomposition is called.

```

! Ask the CompSplitter for component identifier
ocn_id = CompSplitter % comp_id("OCN")

! Initialize the communicator object with the number of components and the local
! communicator size of each component
call comm_ga % init(CompSplitter % comp_defined(), CompSplitter % comm_local_size())

! Ask the CompSplitter for process list of the component
call CompSplitter % proc_list("OCN", list = proc_list_ocn)

! Register the group for ocean only
call comm_ga % init_group(ocn_id, proc_list_ocn)

! We register the array without specifying a subscriber -- this will be the
! component itself. In addition, we only transfer the dimensions of the array il,jl
call comm_ga % init_array(arr_name = "priv_2D", datatype = "real4", dim1_len = il, &
    dim2_len = jl, holder_id = ocn_id, &
    holder_size = CompSplitter % comm_local_size("OCN"))

! Put data (again global)
call comm_ga % put("priv_2D", (/ 1, 1 /), (/ il, jl /), tgd % glob(:, :, 1, 1))

! Synchronize to make sure that everyone put the data
call comm_ga % sync(ocn_id)

! Get the local data
call comm_ga % get("priv_2D", (/ w, s /), (/ e, n /), tgd % loc_2D)

```

## 5.7 Additional tools for the model

The tools listed in this section are not the logical part of the CMF, but represent some external tools that the client code can use. For example, although halo exchanges or reduce-operations are not necessary for all models, CMF contains them as separate “convenient” functions that work on the communicator of the calling model and are not visible to the rest of the system.

## Halo updater

### General idea

In many models, there is a need to exchange the border cells of the local calculation domain of each process with the neighboring processes. This task is solved by the class `HaloUpdater`. Formally, it is not a part of the CME, but is a separate module that any model can use. Now the exchange functions are implemented for latitude-longitude and bipolar grids (both for T- and V-cells), for 2D-, 3D-arrays of any kind used in the ocean model. Structurally, the module consists of a template class `HaloUpdaterBase` (without specifying the types), which does the basic work, and the `HaloUpdater` class, which presents the high-level interface to the client and calls specific methods of the low-level class.

From the user's point of view, when you connect the `halo_updater_module`, the `HaloUpdateMaster` object becomes available, which is used for exchanges.

### Example of usage

Details of operation of the updater can be found in the test (`coupler/test/halo_update`). Below is a typical example of use. Note the optional parameter `change_size_on_bipolar`: if it is equal to the `.true.`, the sign will be changed. In the opposite case (or if it is not specified), the sign will be saved. In addition, for convenience, all procedures have the same form for all types of arrays (this is called function overloading).

```
use halo_updater_module

! Create a decomposition object
ocn_decomp = Decomposition(180, 90, 20, "2D", comm_local_size, rank_local, &
    is_icycle = .true., is_bsc = .true.)

! Initialize the master, specifying the model decomposition and
! the maximum halo width
call HaloUpdateMaster % init(decomp = ocn_decomp, max_halo_width = 2)

! Ready to exchange: in this case we exchange a three-dimensional array
! of temperatures with halo width 1
call HaloUpdateMaster % update(t_c(:,:,:),1), update_width = 1, grid_type = 'T')

! And now a two-dimensional array u_c(1,:,:) with halo width 2
call HaloUpdateMaster % update(u_c(1,:,:), update_width = 2, grid_type = 'V', &
    change_sign_on_bipolar = .TRUE.)
```

## Other utilities

### UtilsAllReduce

Returns the global sum of a variable on the communicator or, in the presence of weights, a weighted sum. Warning: Be careful with global operations – they can lead to performance degradation.

```
use utils_module

real(kind=8) :: my_global_sum, my_global_int

! Calculate the sum over the ocean communicator for the variable some_local_val
my_global_sum = UtilsAllReduce(local_val = some_local_val, comm = ocn_comm)

! Calculate the area-weighted sum over the ocean communicator for the variable
! some_local_int
my_global_int = UtilsAllReduce(local_area = some_area, local_val = some_local_int, &
```

```
comm = ocn_comm)
```

## PointSaver

Saves a data point along with the corresponding timestamp.

```
use point_saver_module

type(PointSaver) :: ps
real(8) :: some_val

! Initialize the object with the name of the file (and the same name as the variable
! inside it) and the period of data flush to disk.
call ps % init(varname = "var1", flush_period = 100)

! Put the data to the file together with the current time
! (in this case it is requested from the component via the method model_time())
call ps % put(some_val, cmp_ptr % model_time())

! Do not forget to call the destructor at the end (close the file)
call ps % destroy()
```

## 6 Short instructions

Here are brief lists, which you should not forget about while reconfiguring the model.

### 6.1 Configuration switch

- Number of ice cores is specified in **ice\_in** and **comp\_ice**
- Ice timestep is specified in **ice\_in** and **ice\_list.in**
- Forcing data bases are chosen in **atm\_list.in** and **lnd\_list.in**
- The formula of freezing point in **ice\_module.f90** is desirable to be the same as in the used thermodynamics scheme of CICE (by default – mushy).
- After each reconfiguring, affecting the CICE settings, completely rebuild the coupled model.
- If the reduced ice grid is used then in **ice\_list.in** and **config** ther must be specified the reduced j-size of the domain.
- Ocean-ice coupling frequency is specified in two places: in **o\_tf\_module.f90** and **ice\_cice\_driver\_module.f90**.

### 6.2 Deep reconfiguring of the forcing under CMF2.0

- Forcing in all components (atmosphere, land, ...) should start with the same date.
- The start date in **run\_list.in** must coincide with the start date of the forcing database.
- Check the tuning of **time\_start\_min**
- Check the in situ – potential temperature conversion
- Check the sea level initialization
- Check whether the SST relaxation is on or off

- When registering reads from files (`ACTION_READ_FD`) within each component, all reading periods must be a multiple of the minimum of the reading periods of this component. In particular, because of this, either the periods of reading the average monthly values (runoff, rain, etc.) have to be 30.5 or even 30 days instead of  $1440 * 365/12$  minutes, or you need to enter an additional probe value, read with a period of 2 hours .

## 7 Elements of numerical and program implementation

### 7.1 Notes on the differences between CMF2.0 and CMF3.0

In both versions of the system, the step counters `time_1` and `time_1_in_run` are initialized by value of 1 at the start from the initial conditions file and incremented outside the `o_driver_module`. They represent the step number that is being taken now (that is, for the ocean, they mean how many steps will be taken when the current step of the physical model is completed). The difference is that for CMF2.0 the whole calendar is calculated basing on these counters and, accordingly, `time_min`, `time_hour`, ... is the moment of the end of the current model step. In CMF3.0, these variables (`time_min`, `time_hour`, ...) are not directly calculated by the coupler and made as an additive, for compatibility with CMF2.0. And they do not correspond to the end, but to the beginning of the current step.

## A Appendix: namelist parameters

Table 1: Namelist parameters

| File        | Variable         | Possible values | Comments                                  |
|-------------|------------------|-----------------|-------------------------------------------|
| atm_list.in | atm_forcing_type | 1               | “normal” year cycle CNYFv2 (CORE-I)       |
|             |                  | 2               | “real” IAFv2 data for 1948-2009 (CORE-II) |
| lnd_list.in | atm_rivers_type  | 1               | “normal” year cycle CNYFv2 (CORE-I)       |
|             |                  | 2               | “real” IAFv2 data for 1948-2009 (CORE-II) |

## B Appendix: standard configurations

### laptev0125c

Test configuration for PC. Computational domain of the size  $40 \times 60$  in the region of the Laptev Sea with the added artificial ring island. The grid is latitude-longitudinal, the resolution is about  $0.125^\circ$ . The ice grid is full. Forcing CNYFv2. The turbulence coefficients are small, close to the global eddy-resolving settings.

### arctic025t

Arctic starting from  $50^\circ$  N with  $0.25^\circ$  resolution. Computational domain of  $1440 \times 160$ , three-polar grid. The ice grid is full. Forcing CNYFv2. Viscosity is only biharmonic, diffusion is 300, of the NEMO type. Implicit Coriolis approximation.
